# Supplementary material for: Optimized Adaptive Radiotherapy with Individualized Plan Library for Muscle-Invasive Bladder Cancer Using Internal Target Volume Generation
Source: MDPI journal article supplement (doi:10.3390/cancers14194674), 2022-09-26
Supplement: s1 [file s1]

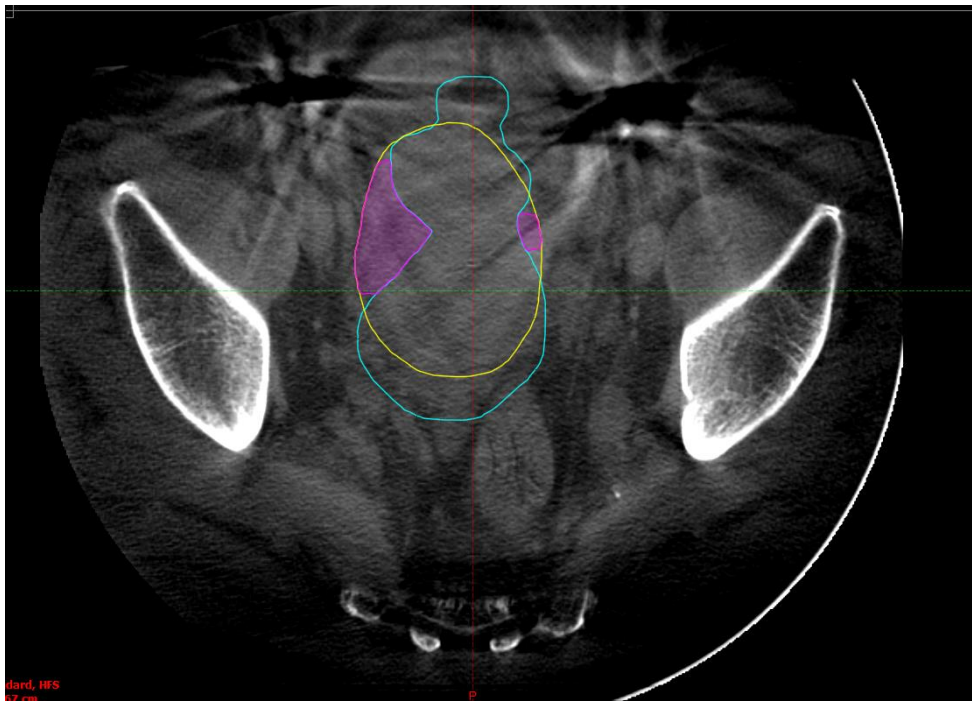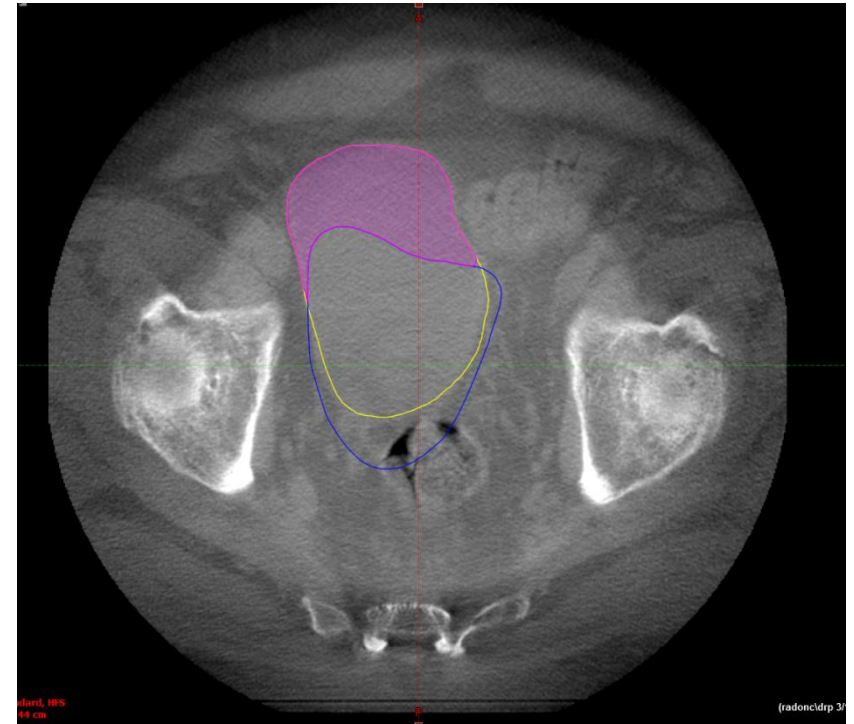

| no. | Library | Good | Fair | Poor | Null |
|-----|---------|------|------|------|------|
| 1   | 22      | 21   | 0    | 1    | 0    |
| 2   | 23      | 19   | 3    | 1    | 0    |

postCBCT bladder – PTV original : calculation  
 If, calculation volume  $<0.05$  : **Fair**  
 If, calculation volume  $\geq 0.05$  : **poor**
