# Supplementary material for: Optimized Adaptive Radiotherapy with Individualized Plan Library for Muscle-Invasive Bladder Cancer Using Internal Target Volume Generation
Source: MDPI journal article supplement (doi:10.3390/cancers14194674), 2022-09-26
Supplement: s1 [file s1]

Supplementary Table S1. post treatment CBCT bladder coverage.

| Patient no. | Library count | Good | Fair | Poor | Null |
|-------------|---------------|------|------|------|------|
| 1           | 22            | 21   | 0    | 1    | 0    |
| 2           | 23            | 19   | 3    | 1    | 0    |
| 3           | 22            | 20   | 2    | 0    | 0    |
| 4           | 22            | 22   | 0    | 0    | 0    |
| 5           | 22            | 18   | 0    | 4    | 0    |
| 6           | 21            | 20   | 0    | 0    | 1    |
| 7           | 20            | 20   | 0    | 0    | 0    |
| 8           | 21            | 18   | 2    | 1    | 0    |
| 9           | 21            | 21   | 0    | 0    | 0    |
| 10          | 19            | 19   | 0    | 0    | 0    |
| 11          | 22            | 22   | 0    | 0    | 0    |
| 12          | 22            | 22   | 0    | 0    | 0    |
| 13          | 22            | 20   | 0    | 2    | 0    |
| 14          | 22            | 19   | 0    | 3    | 0    |
| 15          | 20            | 20   | 0    | 0    | 0    |
| 16          | 22            | 22   | 0    | 0    | 0    |
| 17          | 22            | 22   | 0    | 0    | 0    |
| 18          | 21            | 19   | 2    | 0    | 0    |
| 19          | 22            | 21   | 1    | 0    | 0    |
| Total       | 408           | 385  | 10   | 12   | 1    |

Supplementary Table S2. Patterns of disease recurrence.

| Site of recurrence | n (%)     |
|--------------------|-----------|
| Local NMIBC        | 3 (15.8%) |
| Local MIBC         | 2 (10.5%) |
| Local+distant      | 1 (5.3%)  |
| Distant only       | 2 (10.5%) |
| Total              | 8 (42.1%) |

MIBC, muscle-invasive bladder cancer; NMIBC, non-muscle-invasive bladder cancer.

Supplementary Table S3. Univariate analysis and multivariate analysis for 2-year OS.

| Variable      | Number | Univariate analysis |         | Multivariate analysis |         |
|---------------|--------|---------------------|---------|-----------------------|---------|
|               |        | 2-yr OS (%)         | P-value | HR (95% CI)           | P-value |
| Age (years)   |        |                     |         |                       |         |
| <80           | 8      | 66.7%               | 0.514   | -                     |         |
| ≥80           | 11     | 59.7%               |         |                       |         |
| Gender        |        |                     |         |                       |         |
| Male          | 13     | 50.8%               | 0.173   | -                     |         |
| Female        | 6      | 100%                |         |                       |         |
| CCI           |        |                     |         |                       |         |
| <4            | 12     | 53.9%               | 0.356   | -                     |         |
| ≥4            | 7      | 83.3%               |         |                       |         |
| ECOG          |        |                     |         |                       |         |
| 0-1           | 18     | 62.8%               | 0.650   | -                     |         |
| 2-3           | 1      | 100%                |         |                       |         |
| T stage       |        |                     |         |                       |         |
| 2             | 13     | 68.8%               | 0.482   | -                     |         |
| 3-4           | 6      | 53.3%               |         |                       |         |
| Induction CTx |        |                     |         |                       |         |
| Received      | 6      | 80.0%               | 0.507   | -                     |         |
| Not received  | 13     | 62.5%               |         |                       |         |
| CCRT          |        |                     |         |                       |         |
| Received      | 10     | 66.7%               | 0.381   | -                     |         |
| Not received  | 9      | 55.6%               |         |                       |         |

Supplementary Table S4. Organ at risk constraints.

| Constratints |       |       |
|--------------|-------|-------|
| Recutm       | 50 Gy | 20%   |
|              | 70 Gy | 7%    |
| Small bowel  | V35   | 180cc |
|              | V40   | 100cc |
|              | V45   | 65cc  |
|              | D max | 50 Gy |
| Femur head   | V40   | 35%   |
|              | V45   | 10%   |
|              | Dmax  | 50 Gy |
