# Supplementary figures and images for: Optimized Adaptive Radiotherapy with Individualized Plan Library for Muscle-Invasive Bladder Cancer Using Internal Target Volume Generation
Source: MDPI journal article supplement (doi:10.3390/cancers14194674), 2022-09-26

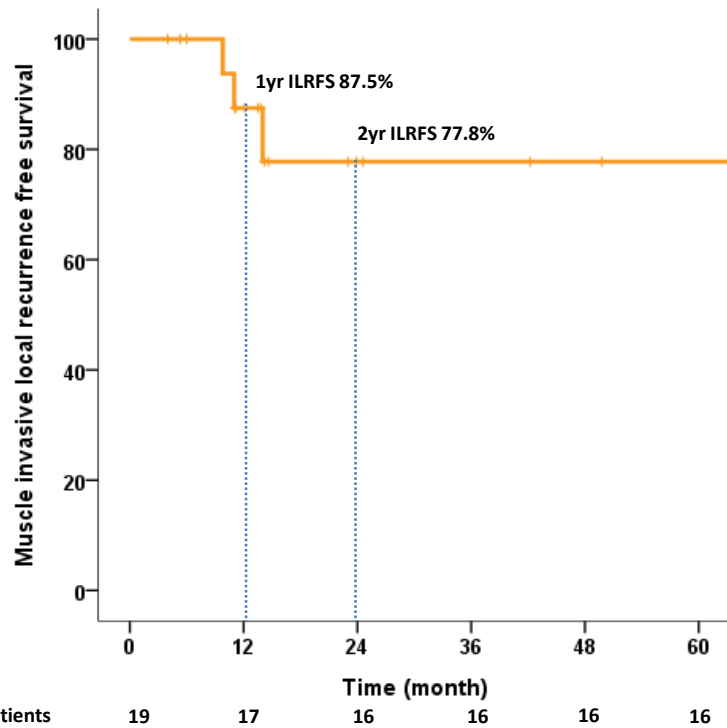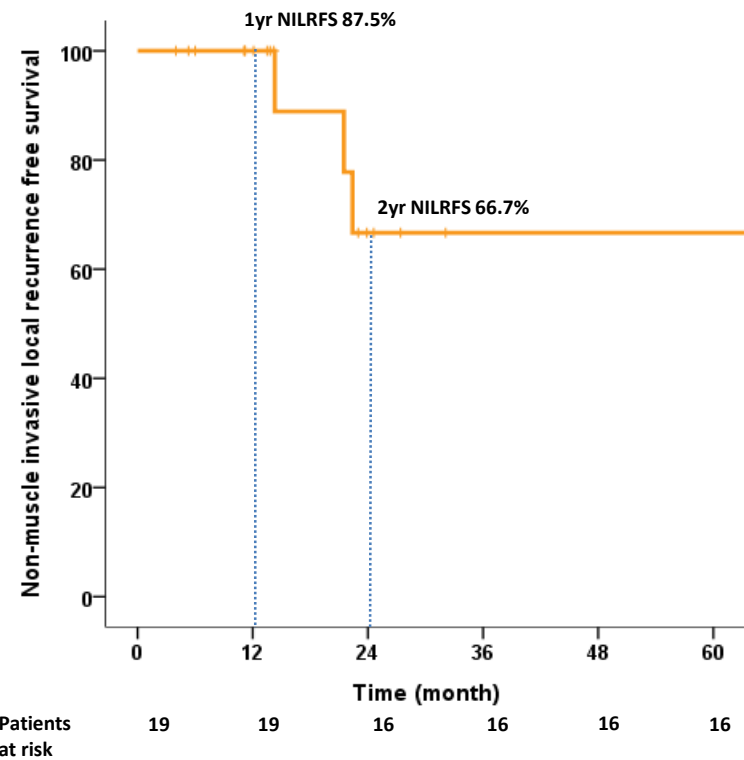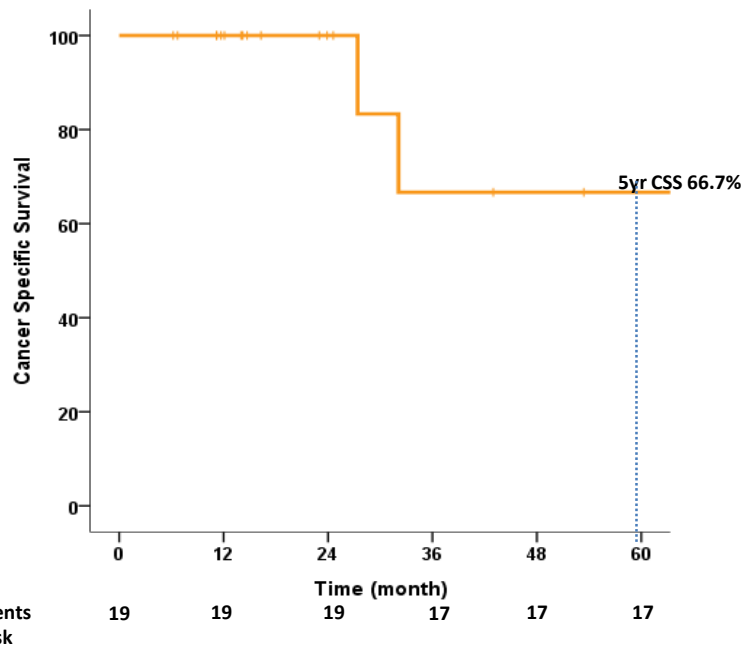

Supplement: s1 [file s1]
